# Supplementary material for: Increased expression of the thyroid hormone nuclear receptor TRα1 characterizes intestinal tumors with high Wnt activity
Source: PubMed Central journal article supplement (PMC6089551; doi:10.18632/oncotarget.25741), 2018-07-24
Supplement: oncotarget-09-30979-s001.pdf [file oncotarget-09-30979-s001.pdf]

## Increased expression of the thyroid hormone nuclear receptor TR $\alpha$ 1 characterizes intestinal tumors with high Wnt activity

### SUPPLEMENTARY MATERIALS

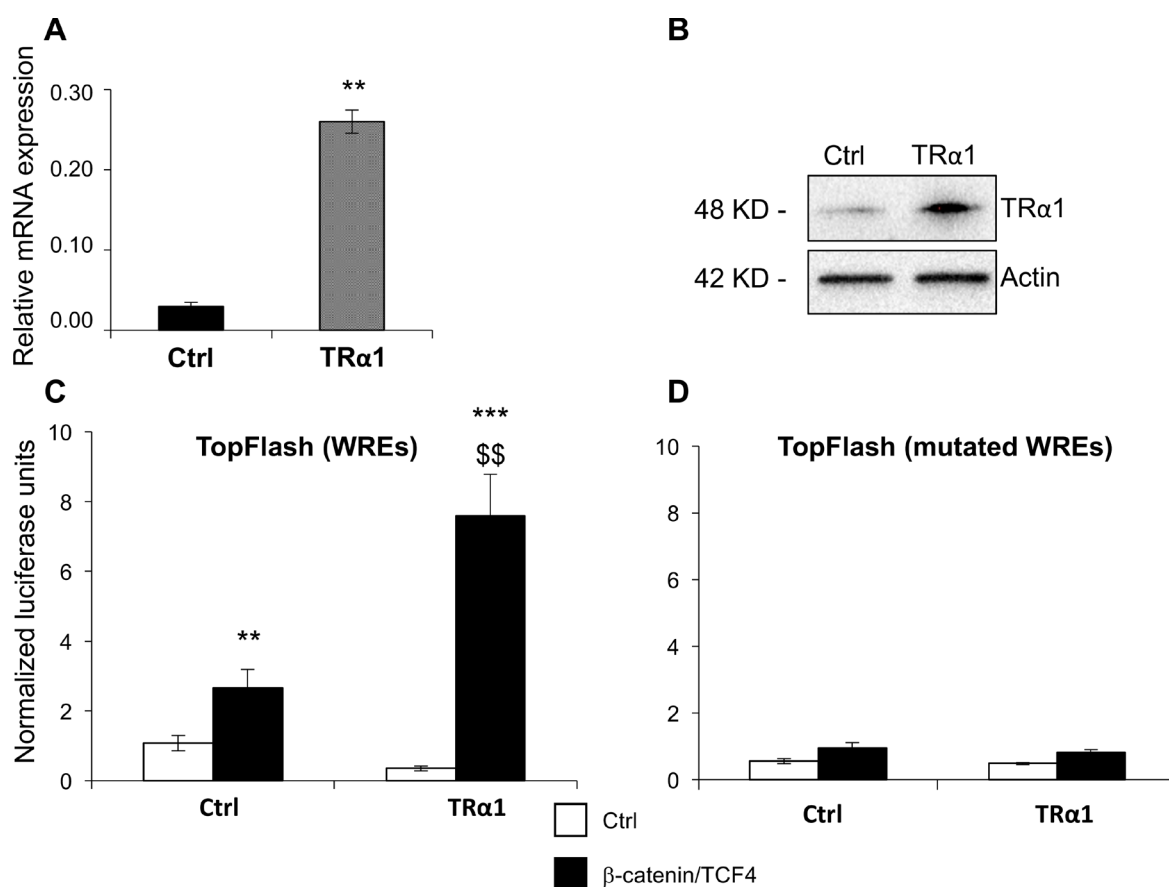

#### Supplementary Figure 1: Increased expression of TR $\alpha$ 1 hyper-activates canonical Wnt/ $\beta$ -catenin signalling pathway.

(A, B) Generation of stably overexpressing TR $\alpha$ 1 Caco2 cell line. The overexpression efficiency was assessed by comparing TR $\alpha$ 1 mRNA by RTqPCR (A) or protein by IB (B). \*\* $P < 0.01$  compared with control condition (Ctrl) by Student's  $T$ -test. (C, D) Increased TR $\alpha$ 1 expression potentiates canonical Wnt signalling activity. Bar graphs display quantification of luciferase activity in Caco2 cell lines generated in A after transfection with a TopFlash vector (C) or the negative control FopFlash vector (D) to monitor Wnt activity using the Dual-Luciferase Reporter Assay System. Caco2 cells were maintained in culture medium containing physiological concentrations of T3 in the absence (Ctrl) or in presence of co-transfected  $\beta$ -catenin/TCF4 complex. Histograms represent mean  $\pm$  SD ( $N = 6$ ) from one out of three independent experiments. \*\* $P < 0.01$  and \*\*\* $P < 0.001$  compared with the control condition of the same cell line; <sup>\$\$</sup> $P < 0.01$  compared with the  $\beta$ -catenin/TCF4 condition of the control cells, by Student's  $T$ -test.

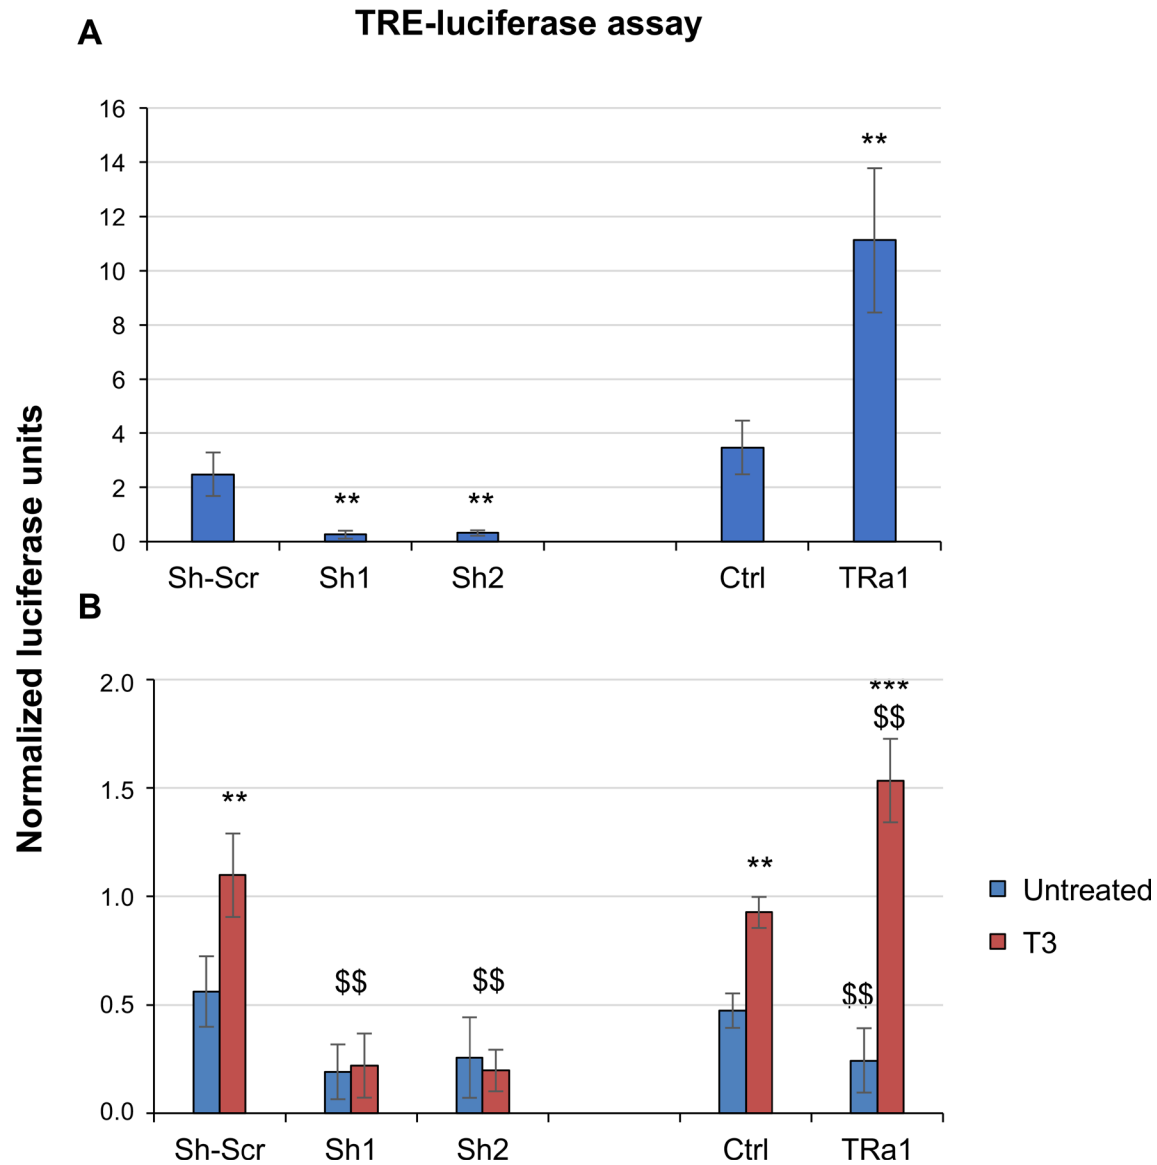

**Supplementary Figure 2: Responsiveness of the different Caco2 cell lines to a TRE-luciferase assay *in vitro*.** (A) The TRE-luciferase reporter was transfected into Caco2 cells maintained in culture medium supplemented with 10% FBS, thus containing physiological concentrations of T3. Histograms represent mean  $\pm$  SD from two independent experiments, each conducted in six replicates ( $n = 6$ ). \*\* $P < 0.01$  compared with the respective control condition (Sh-Scr or Ctrl) by Student's  $t$ -test. (B) The TRE-luciferase reporter was transfected into Caco2 cells maintained in culture medium supplemented with 10% of T3-depleted FBS in the presence (T3) or absence (untreated) of  $10^{-6}$  M T3, as indicated. Histograms represent mean  $\pm$  SD from two independent experiments, each conducted in six replicates ( $n = 6$ ). \*\* $P < 0.01$ , \*\*\* $P < 0.001$  compared with the respective untreated condition; \$\$ $P < 0.01$  compared with Sh-Scr or Ctrl cell line in the same condition, by Student's  $t$ -test.

**A**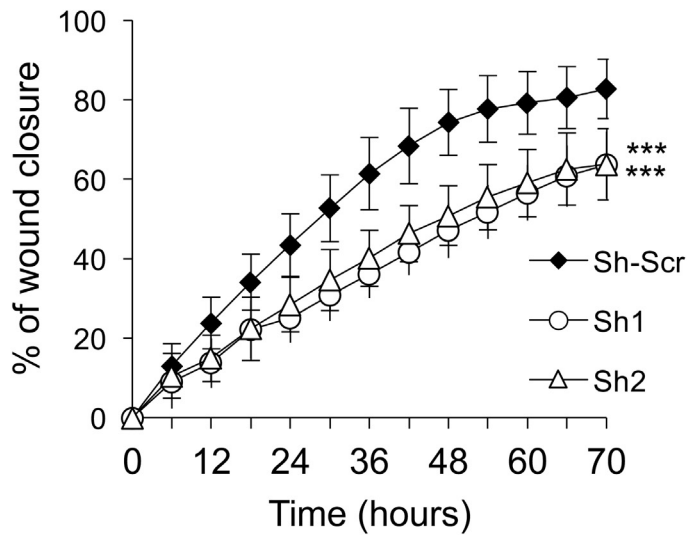**B**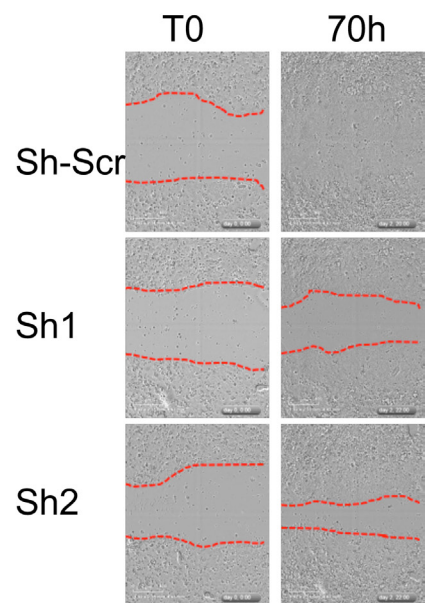

**Supplementary Figure 3: Complementary analysis of TR $\alpha$ 1-dependent cell migration in colorectal cancer cells.**

Depletion of TR $\alpha$ 1 inhibits 2-D cell migration. Confluent monolayers of Caco2 cells were scratch-wounded and incubated for 70 hr in FBS-deprived non-proliferative condition, and wound closure was monitored and quantified. In panel (A) confluence indexes (y-axis) in cell lines are displayed as line graphs. Note that depletion of TR $\alpha$ 1 significantly delays wound closure. Histograms represent mean  $\pm$  SEM ( $N = 10$ ) from one of three independent experiments, each conducted in 10 replicates. Panel (B) shows representative pictures of different cell lines taken at T0 or T70. Red dashed lines in B delineate the wounded surface (T0) and the surface still depleted of cells (T70). \*\*\* $P < 0.001$  and \*\*\*\* $P < 0.0001$  by Student's  $T$ -test. \*\*\* in (A) applies to each time-point.

**A**

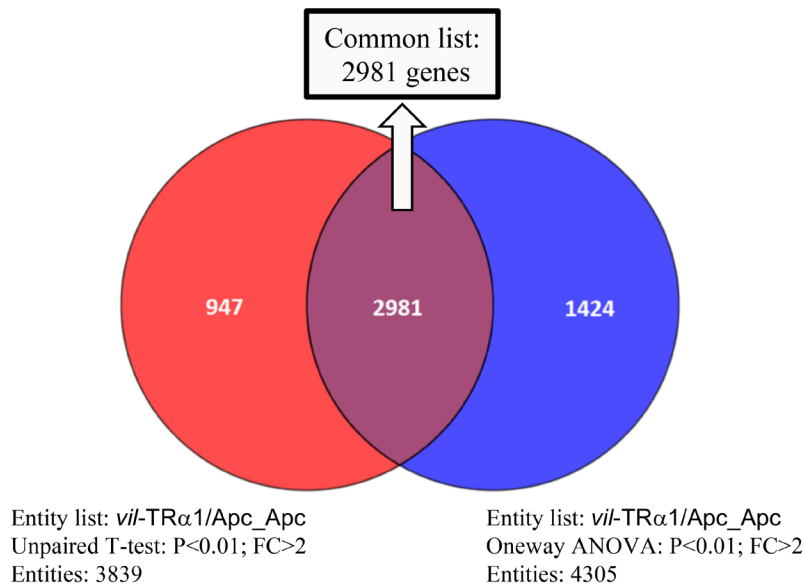

**B**

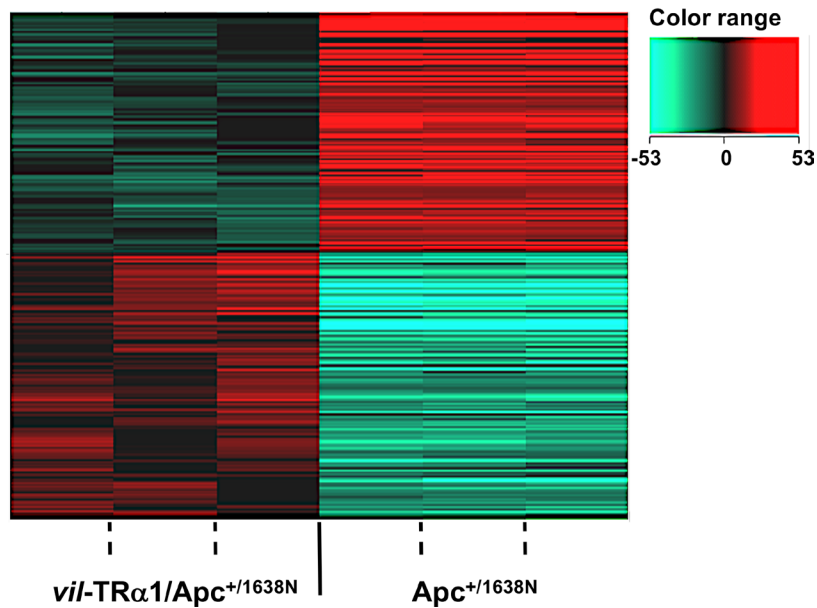

**Supplementary Figure 4: Generation of a list of differentially expressed genes and their hierarchical clustering.**

(A) Venn Diagram representing the 3839 differentially expressed genes obtained by performing the *T*-test (left), the 4305 differentially expressed genes obtained with the ANOVA test (right) and the 2981 common genes. For further studies we focused specifically on the common list. (B) Hierarchical clustering enabled to observe the relations between the tumors of different genotype and to visualize the differentially expressed genes. In this clustering, the 2981 transcripts were grouped in two dendrograms, each of which represents a genotype. Each line is a probe and each column is an RNA sample hybridized on an array slide. Expression signal intensities are shown in red and green, indicating high and low expression levels respectively. Dotted lines delineate each individual sample; adenocarcinoma samples of different genotype are separated by the thick line.

**A**

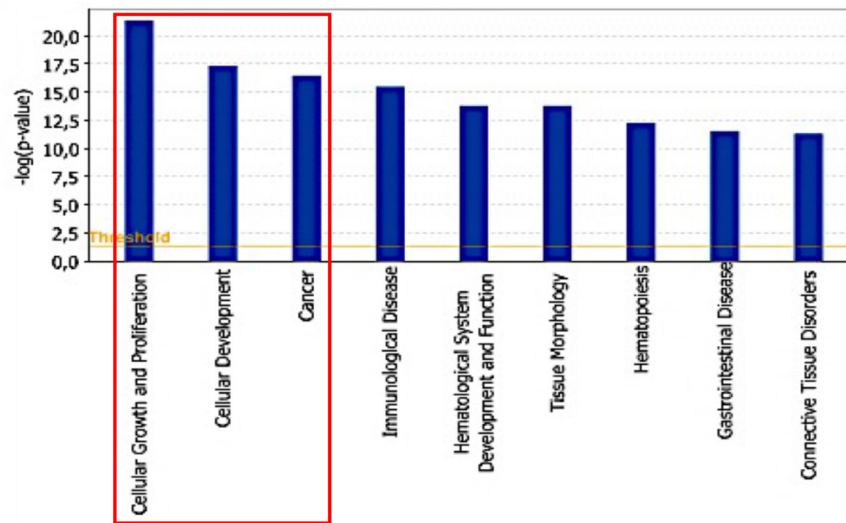

| Category                          | Functions Annotation   | P-value  | Genes |
|-----------------------------------|------------------------|----------|-------|
| Cellular Growth and Proliferation | Proliferation of cells | 4.35E-22 | 423   |
| Cellular Development              | Differentiation        | 4.51E-18 | 316   |
| Cancer                            | Tumorigenesis          | 3.36E-17 | 558   |

**B**

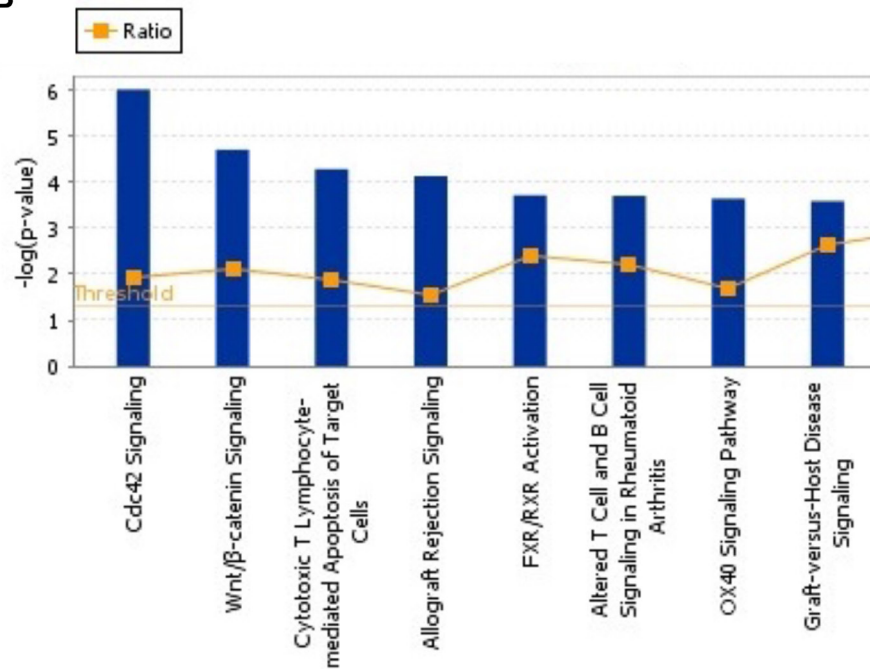

**Supplementary Figure 5: Gene ontology analysis for significantly changed transcripts by Ingenuity Pathway Analysis.**

(A) Bar chart illustrating Biological Functions associated with the differentially expressed genes. Table summarizing the top 3 functions, their statistical significance and the number of genes present in each category. (B) Bar chart of the most significant canonical pathways associated with the differentially expressed genes.

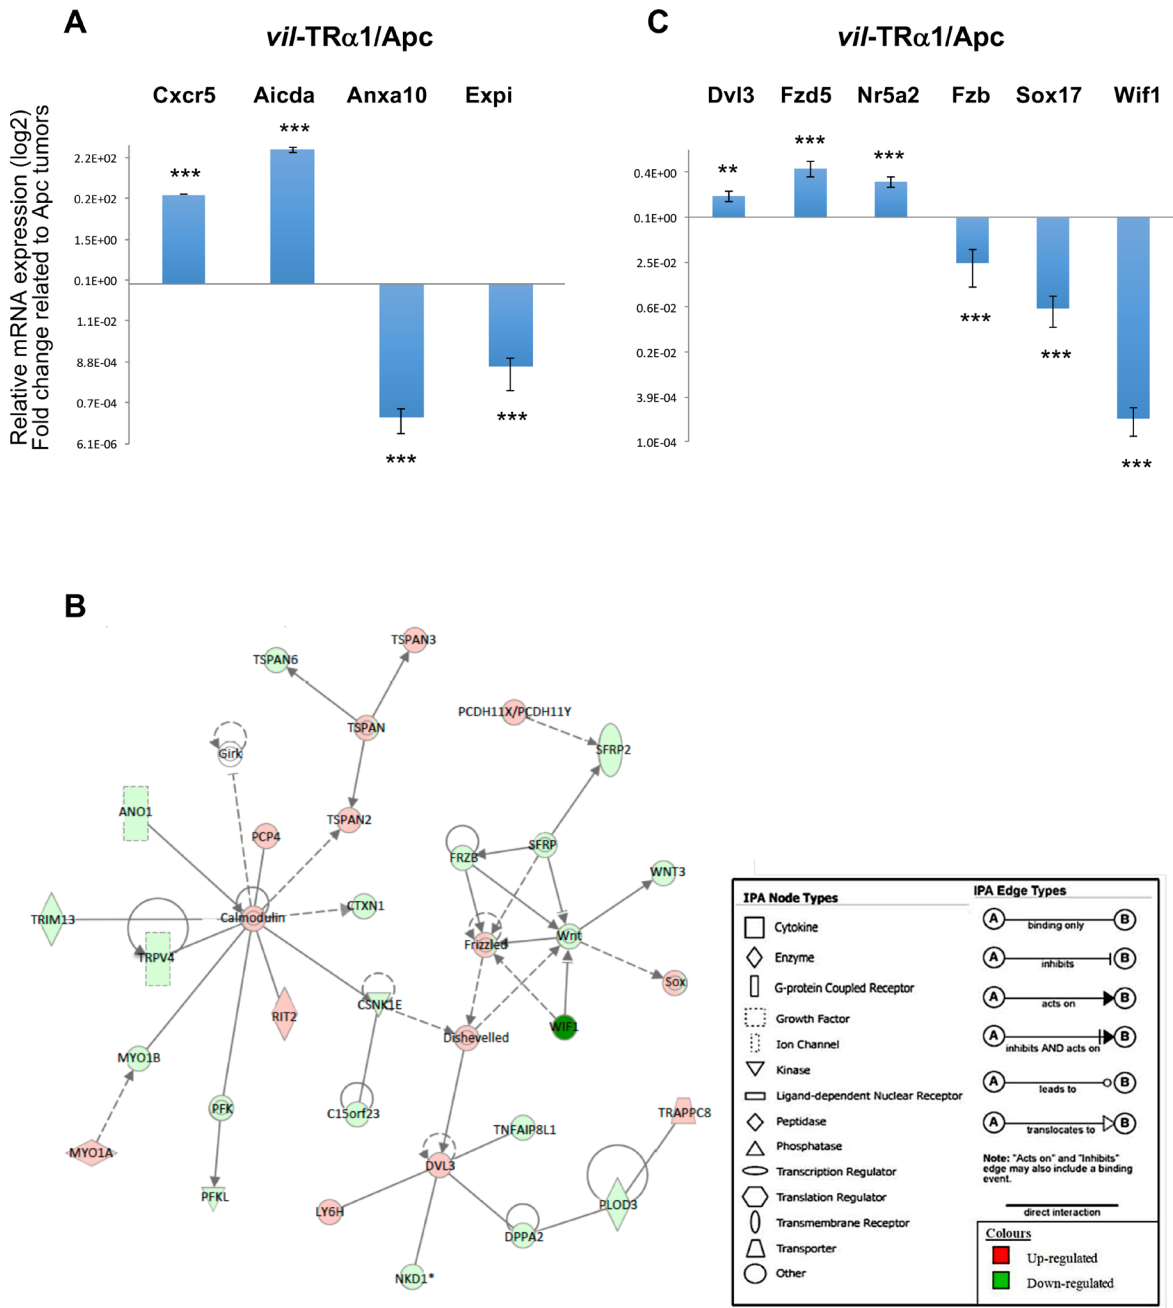

**Supplementary Figure 6: Differentially expressed gene validation and modeling.** (A) Analysis of strongly regulated genes by RTqPCR. Histograms show fold changes in *vil-TRα1/Apc* tumors related to Apc tumors. \*\*\* $P < 0.001$  compared with Apc tumors by Student's  $T$ -test. (B) Molecular relationships between transcripts in the identified network "Cellular growth, Cell proliferation and Cancer" by Ingenuity Pathway Analysis. Genes or gene products are represented as nodes and connections between genes are supported by information in the Ingenuity Knowledge Base. The color indicates upregulation (red) or downregulation (green). Different shapes of nodes represent different functional classes of gene products as indicated in the legend inset (right panel). (C) Analysis of the Wnt agonists and antagonists present within the gene network in B. Histograms show fold changes in *vil-TRα1/Apc* tumors related to Apc tumors. \*\* $P < 0.01$  and \*\*\* $P < 0.001$  compared with Apc tumors by Student's  $T$ -test. Note that agonists are up-regulated and the antagonists are down-regulated in TRα1-overexpressing tumors.

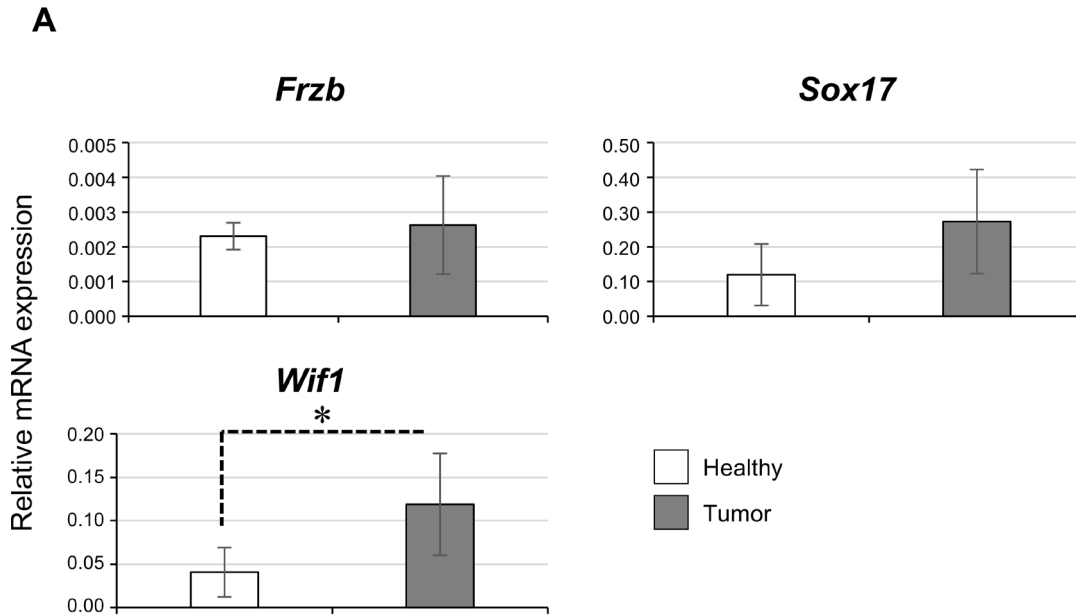

**B**

|              | Fold change<br>TR $\alpha$ <sup>0/0</sup> /Apc vs Apc |                   | Fold change<br>TR $\alpha$ <sup>0/0</sup> /Apc vs vil-TR $\alpha$ 1/Apc |        |
|--------------|-------------------------------------------------------|-------------------|-------------------------------------------------------------------------|--------|
|              | Healthy                                               | Tumor             | Healthy                                                                 | Tumor  |
| <b>Frzb</b>  | 0.8 <sup>NS</sup>                                     | 1.7*              | 1.5*                                                                    | 7.6**  |
| <b>Sox17</b> | 1.6 <sup>NS</sup>                                     | 5.6*              | 3.4*                                                                    | 92.7** |
| <b>Wif1</b>  | 1.5 <sup>NS</sup>                                     | 0.8 <sup>NS</sup> | 5.1**                                                                   | 372*** |

**Supplementary Figure 7: Expression of Wnt inhibitors in TR $\alpha$ 0/0/Apc animals.** (A) Analysis of Frzb, Sox17 and Wif1 mRNA expression in healthy mucosae and tumors from TR $\alpha$ 0/0/Apc animals. Histograms represent mean  $\pm$  SD. \* $P < 0.05$  by Student's  $t$ -test ( $N = 6/8$ ). (B) Comparative study of the inhibitor's mRNA expression in healthy mucosae or tumors from TR $\alpha$ 0/0/Apc animals and those from Apc or vil-TR $\alpha$ 1/Apc mice. \* $P < 0.05$ , \*\* $P < 0.01$ , \*\*\* $P < 0.001$ , by Student's  $T$ -test. NS: not significant.





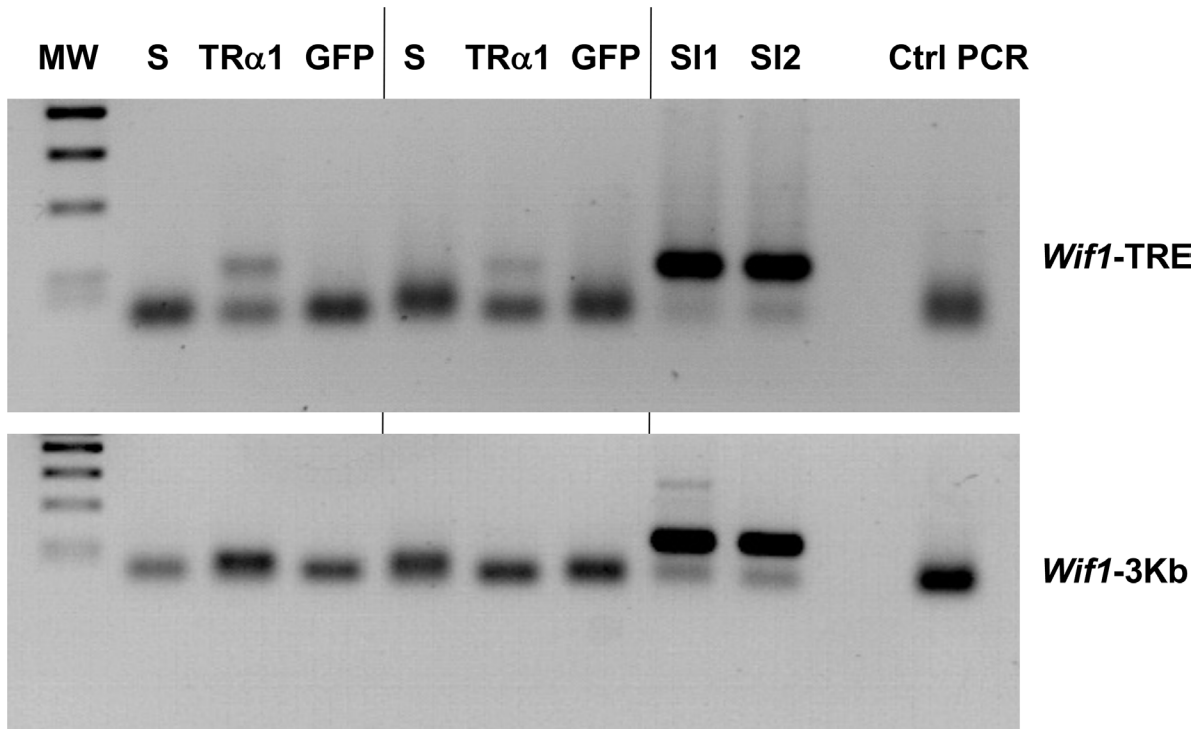

**Supplementary Figure 9: Molecular analysis of the Thyroid hormone Responsive Element present in the Wif1 gene, by in vivo chromatin immunoprecipitation.** Study by qPCR of the DNA purified from the different samples before and after ChIP visualized on agarose gel. The picture is representative of two independent experiments. Indicated on the right part of each panel is the fragment of amplified Wif1 gene. S: pre-immune serum; TR $\alpha$ 1: anti-TR $\alpha$ 1; GFP: anti-GFP; SI: starting input; Ctrl PCR: negative control for PCR mix.

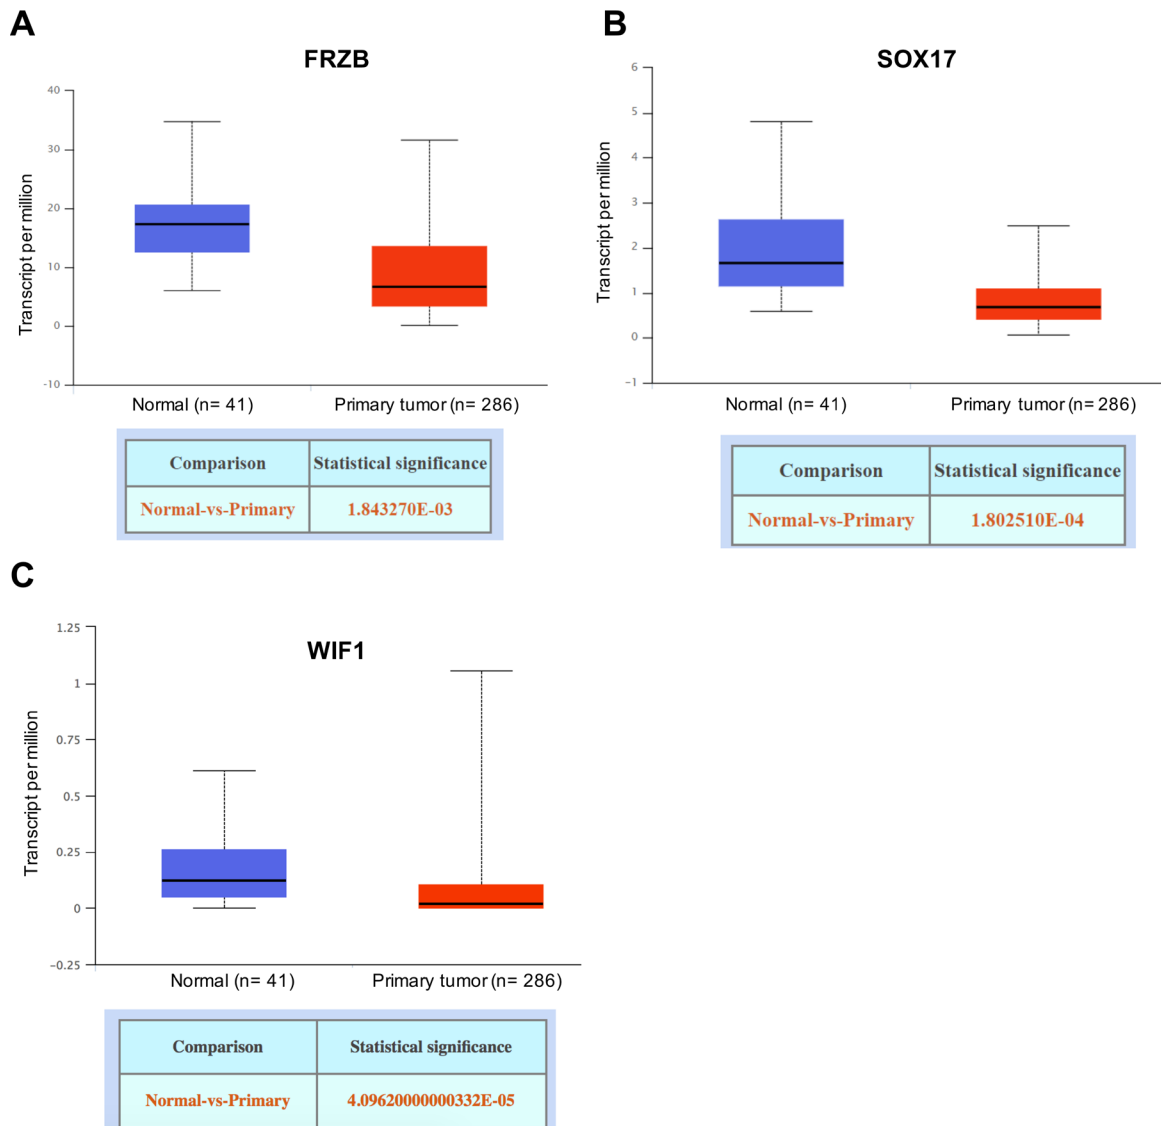

**Supplementary Figure 10: Analysis of FRZB, SOX17 and WIF1 mRNA expression in CRC patients.** (A) FRZB, (B) SOX17 and (C) WIF1 mRNA expression values in TCGA (The Cancer Genome Atlas) dataset. Boxplots illustrate the distribution of data and the mean (black thick line). Note that all of the Wnt antagonists are significantly down-regulated in CRCs, as indicated.



**Supplementary Table 1: Circulating serum levels of the hormones T3 and T4 (pmol/l) in 10/12-month old animals of different genotype**

|                                                           | <b>Free T3</b> | <b>Free T4</b> |
|-----------------------------------------------------------|----------------|----------------|
| <b>WT</b> ( $N = 5$ )                                     | 7.23 ± 3.2     | 19,56 ± 8.7    |
| <b>Apc<sup>+1638N</sup></b> ( $N = 8$ )                   | 8.12 ± 1.2     | 21.24 ± 4.5    |
| <b><i>vil</i>-TRα1/Apc<sup>+1638N</sup></b> ( $N = 7$ )   | 7.42 ± 3.7     | 18,56 ± 6.3    |
| <b>TRα<sup>0/0</sup>/Apc<sup>+1638N</sup></b> ( $N = 8$ ) | 9.56 ± 2.87    | 22.67 ± 3.32   |

**Supplementary Table 2: Differentially expressed genes between *vil*-TRα1/Apc and Apc adenocarcinomas.** See Supplementary\_ Table\_2

**Supplementary Table 3: Analysis of differentially expressed genes by RTqPCR**

| Wnt                  |                          |             |              |                      |
|----------------------|--------------------------|-------------|--------------|----------------------|
| Gene symbol          | Regulation by microarray | Fold change | P-value      | Validation by RTqPCR |
| <i>Acvr1c</i>        | UP                       | 5.2838616   | 0.0000559536 | Yes                  |
| <i>Acvr2a</i>        | UP                       | 2.4383454   | 0.0029552912 | Yes                  |
| <i>Dvl3</i>          | UP                       | 4.580133    | 0.0002162574 | Yes                  |
| <i>Frzb</i>          | DOWN                     | -3.6924949  | 0.0014074678 | Yes                  |
| <i>Fzd5</i>          | UP                       | 3.4337366   | 0.0007183285 | No                   |
| <i>Fzd6</i>          | DOWN                     | -7.5305276  | 0.0001336503 | Yes                  |
| <i>Nr5a2</i>         | UP                       | 3.385896    | 0.0000031533 | Yes                  |
| <i>Mmp7</i>          | DOWN                     | -50.217285  | 0.0000406142 | Yes                  |
| <i>Rarb</i>          | DOWN                     | -9.686127   | 0.0000023553 | Yes                  |
| <i>Rarg</i>          | DOWN                     | -3.0901685  | 0.0002838105 | Yes                  |
| <i>Smo</i>           | DOWN                     | -3.0170665  | 0.0000010985 | Yes                  |
| <i>Sox1</i>          | UP                       | 3.5006268   | 0.0000613482 | Yes                  |
| <i>Sox4</i>          | DOWN                     | -21.243048  | 0.0000052871 | Yes                  |
| <i>Sox7</i>          | DOWN                     | -8.95734    | 0.0022291788 | Yes                  |
| <i>Sox9</i>          | DOWN                     | -35.4406    | 0.0000303983 | Yes                  |
| <i>Sox17</i>         | DOWN                     | -55.627438  | 0.0001215411 | Yes                  |
| <i>Sox21</i>         | DOWN                     | -23.753094  | 0.0000002027 | Yes                  |
| <i>Src</i>           | UP                       | 3.7255604   | 0.0029647003 | Yes                  |
| <i>Wif1</i>          | DOWN                     | -1371.4115  | 0.0000050957 | Yes                  |
|                      |                          |             |              |                      |
|                      |                          |             |              |                      |
|                      |                          |             |              |                      |
| Notch                |                          |             |              |                      |
| Gene symbol          | Regulation by microarray | Fold change | P-value      | Validation by RTqPCR |
| <i>Cntn1</i>         | UP                       | 4.9028287   | 0.0000516208 | Yes                  |
| <i>Dtx1</i>          | UP                       | 22.044329   | 0.005482353  | Yes                  |
| <i>Hes5</i>          | UP                       | 16.803392   | 0.0031873302 | Yes                  |
| <i>Hey1</i>          | DOWN                     | -7.8807583  | 0.0003987197 | No                   |
| <i>Jag2</i>          | DOWN                     | -8.332342   | 0.0000513452 | Yes                  |
| <i>Notch1</i>        | UP                       | 7.1939216   | 0.0012534232 | Yes                  |
| <i>Notch4</i>        | DOWN                     | -4.1032467  | 0.0004885656 | Yes                  |
| <i>Numb</i>          | UP                       | 2.177536    | 0.0005998857 | Yes                  |
|                      |                          |             |              |                      |
|                      |                          |             |              |                      |
|                      |                          |             |              |                      |
| TH/-TR/NHR signaling |                          |             |              |                      |
| Gene symbol          | Regulation by microarray | Fold change | P-value      | Validation by RTqPCR |
| <i>Rarb</i>          | DOWN                     | -9.686127   | 0.0000023553 | Yes                  |
| <i>Rarg</i>          | DOWN                     | -3.0901685  | 0.0002838105 | Yes                  |
| <i>Nr5a2</i>         | UP                       | 3.385896    | 0.0000031533 | Yes                  |
|                      |                          |             |              |                      |
|                      |                          |             |              |                      |
|                      |                          |             |              |                      |
| Strongly regulated   |                          |             |              |                      |
| Gene symbol          | Regulation by microarray | Fold change | P-value      | Validation by RTqPCR |
| <i>Cxcr5</i>         | UP                       | 627.18054   | 0.009746668  | Yes                  |
| <i>Aicda</i>         | UP                       | 233.39041   | 0.0038877805 | Yes                  |
| <i>Expi</i>          | DOWN                     | -1749.5175  | 0.0025388557 | Yes                  |
| <i>Anxa10</i>        | DOWN                     | -2380.4036  | 0.0001345147 | Yes                  |
| <i>Spp1</i>          | DOWN                     | -263.31964  | 0.0004751938 | Yes                  |
| <i>Ltf</i>           | DOWN                     | -126.68741  | 0.0009302597 | Yes                  |
| <i>Serpina3n</i>     | DOWN                     | -22.09983   | 0.0003959026 | Yes                  |
| <i>Tff1</i>          | DOWN                     | -859.4737   | 0.0036585595 | Yes                  |
| <i>Trim29</i>        | DOWN                     | -31.6185    | 0.0003671828 | Yes                  |
| <i>Wif1</i>          | DOWN                     | -1371.4115  | 0.0000050957 | Yes                  |

**Supplementary Table 4: Differentially expressed genes present within the network “Cellular growth, Cell proliferation and Cancer”**

| Gene symbol     | Gene Name                                                          | P-value       | Fold Change | Location            | Family                 |
|-----------------|--------------------------------------------------------------------|---------------|-------------|---------------------|------------------------|
| Pcp4            | Purkinje cell protein 4                                            | 9.0323704E-10 | 12.162      | Cytoplasm           | other                  |
| Rit2            | Ras-like without CAAX 2                                            | 5.575777E-7   | 7.573       | Plasma Membrane     | enzyme                 |
| Ly6H            | Lymphocyte antigen 6 complex, locus H                              | 1.4889147E-7  | 5.568       | Plasma Membrane     | other                  |
| Dvl3            | Dishevelled, dsh homolog 3 (Drosophila)                            | 1.7458719E-5  | 4.580       | Cytoplasm           | other                  |
| Myo1A           | Myosin 1A                                                          | 1.8318578E-5  | 4.229       | Cytoplasm           | peptidase              |
| Tspan2          | Tetraspanin 2                                                      | 1.9438273E-8  | 2.682       | Extracellular Space | other                  |
| Tspan3          | Tetraspanin 3                                                      | 9.76963E-4    | 2.232       | Plasma Membrane     | other                  |
| Trappc8         | Trafficking protein particle complex 8                             | 1.247536E-4   | 2.217       | Cytoplasm           | transporter            |
| Pcdh11X/Pcdh11Y | Protocadherin 11 Y-linked                                          | 2.0737643E-5  | 2.179       | Plasma Membrane     | other                  |
| Wif1            | WNT inhibitory factor 1                                            | 3.4672276E-8  | -1371.41    | Extracellular Space | other                  |
| Sfrp2           | Secreted frizzled-related protein 2                                | 2.767383E-4   | -26.721     | Plasma Membrane     | transmembrane receptor |
| Dppa2           | Developmental pluripotency associated 2                            | 5.4807522E-8  | -26.327     | Unknown             | other                  |
| Nkd1            | Naked cuticle homolog 1 (Drosophila)                               | 6.1196306E-7  | -13.087     | Unknown             | other                  |
| Wnt3            | Wingless-type MMTV integration site family, member 3               | 2.309296E-6   | -10.934     | Extracellular Space | other                  |
| Trpv4           | Transient receptor potential cation channel, subfamily V, member 4 | 1.2442643E-4  | -7.394      | Plasma Membrane     | ion channel            |
| Tnfaip8ll       | Tumor necrosis factor, alpha-induced protein 8-like 1              | 8.699543E-8   | -6.543      | Unknown             | other                  |
| Pfkfb3          | Phosphofructokinase, liver                                         | 3.0679496E-6  | -5.338      | Cytoplasm           | kinase                 |
| Trim13          | Tripartite motif containing 13                                     | 7.840267E-4   | -4.344      | Cytoplasm           | enzyme                 |
| Ano1            | Anoctamin 1, calcium activated chloride channel                    | 5.711523E-6   | -4.073      | Plasma Membrane     | ion channel            |
| FrzB            | Frizzled-related protein                                           | 2.5567264E-4  | -3.692      | Extracellular Space | other                  |
| Ctxn1           | Cortixin 1                                                         | 7.485673E-6   | -3.510      | Unknown             | other                  |
| Myo1B           | Myosin 1B                                                          | 1.3866271E-4  | -3.333      | Cytoplasm           | other                  |
| C15orf23        | Chromosome 15 open reading frame 23                                | 4.0513364E-6  | -3.049      | Unknown             | other                  |
| Csnk1E          | Casein kinase 1, epsilon                                           | 1.1423813E-7  | -3.006      | Cytoplasm           | kinase                 |
| Tspan6          | Tetraspanin 6                                                      | 3.1708973E-6  | -2.729      | Plasma Membrane     | other                  |
| Plod3           | Procollagen-lysine, 2-oxoglutarate 5-dioxygenase 3                 | 1.314971E-6   | -2.531      | Cytoplasm           | enzyme                 |

**Supplementary Table 5: Analysis of tumors in animals of different age and genotype**

| <b>AGE: 6-MONTH</b>                            |                          |                                 |                                    |                                                     |
|------------------------------------------------|--------------------------|---------------------------------|------------------------------------|-----------------------------------------------------|
| <b>Genotype</b>                                | <b>Mice<br/><i>N</i></b> | <b>Incidence<br/><i>N</i>-%</b> | <b>Tumors/animal<br/>Mean ± SD</b> | <b>Tumor range absolute<br/><i>n</i>° of tumors</b> |
| <b>Apc<sup>1638N/+</sup></b>                   | 3                        | 3/3<br>100%                     | 1.33 ± 0.58                        | 1–2                                                 |
| <b>TRα<sup>0/0</sup>/Apc<sup>1638N/+</sup></b> | 3                        | 0/3<br>0%                       | 0*                                 | 0                                                   |
| <b>AGE: 8-MONTH</b>                            |                          |                                 |                                    |                                                     |
| <b>Genotype</b>                                | <b>Mice<br/><i>N</i></b> | <b>Incidence<br/><i>N</i>-%</b> | <b>Tumors/animal<br/>Mean ± SD</b> | <b>Tumor range absolute<br/><i>n</i>° of tumors</b> |
| <b>Apc<sup>1638N/+</sup></b>                   | 4                        | 4/4<br>100%                     | 1.25 ± 0.50                        | 1–2                                                 |
| <b>TRα<sup>0/0</sup>/Apc<sup>1638N/+</sup></b> | 5                        | 0/5<br>0%                       | 0**                                | 0                                                   |
| <b>AGE: 12–15 MONTH</b>                        |                          |                                 |                                    |                                                     |
| <b>Genotype</b>                                | <b>Mice<br/><i>N</i></b> | <b>Incidence<br/><i>N</i>-%</b> | <b>Tumors/animal<br/>Mean ± SD</b> | <b>Tumor range absolute<br/><i>n</i>° of tumors</b> |
| <b>Apc<sup>1638N/+</sup></b>                   | 6                        | 6<br>100%                       | 2.33 ± 0.52                        | 2–3                                                 |
| <b>TRα<sup>0/0</sup>/Apc<sup>1638N/+</sup></b> | 9                        | 9/9<br>100%                     | 1.56 ± 0.53**                      | 1–2                                                 |

\* $P < 0.05$  and \*\* $P < 0.01$  compared with Apc mice, by Student *T*-test.

**Supplementary Table 6: Primers used for different analyses.** See Supplementary\_Table\_6
